# Supplementary material
Source: publisher site journal article supplement (https://www.dovepress.com/article/582314)
Supplement: Supplementary file 1 [file 582314%20Supplementary%20Material.docx]

**Table S1** Optimal Model Parameters

| Model | Optimal Model Parameters |
| --- | --- |
| Logistic | NULL |
| SVM | sigma = 0.0896, C = 0.25 |
| GBM | n.trees = 150, interaction.depth = 2, shrinkage = 0.1, n.minobsinnode = 10 |
| NN | Size=5,decay=0.1 |
| XGBoost | Nrounds=50, max_depth=2, eta=0.4, gamma=0, colsample_bytree=0.8, min_child_weight=1, subsample=1 |
| KNN | Kmax=9,distance=2, kernel=optimal |
| LightGBM | objective = "binary",  metric = "auc",  min_data = 1L,  learning_rate = 1.0,  num_threads = 2L, |
| CatBoost | iterations = 100,  use_best_model = TRUE,  eval_metric = 'AUC',  ignored_features =9,  border_count = 32,  depth = 5,  learning_rate = 0.03, |

**List S1** Other attached packages

[1] kernelshap_0.5.0 lightgbm_4.6.0 scales_1.4.0

[4] ROSE_0.0-4 circlize_0.4.16 ComplexHeatmap_2.24.1[7] data.table_1.17.8 cvms_1.8.1 autoReg_0.3.3

[10] mice_3.18.0 VIM_6.2.6 colorspace_2.1-2

[13] RColorBrewer_1.1-3 adabag_5.1 doParallel_1.0.17

[16] iterators_1.0.14 foreach_1.5.2 rpart_4.1.24

[19] tableone_0.13.2 table1_1.5.1 mlr3_1.2.0

[22] ingredients_2.3.0 naivebayes_1.0.0 fastshap_0.1.1

[25] pheatmap_1.0.13 riskRegression_2025.09.17 SparseM_1.84-2

[28] Formula_1.2-5 corrplot_0.95 ROCR_1.0-11

[31] e1071_1.7-16 iml_0.11.4 shapper_0.1.3

[34] plotROC_2.3.3 foreign_0.8-90 survey_4.4-8

[37] survival_3.8-3 Matrix_1.7-3 DynNom_5.1

[40] ResourceSelection_0.3-6 dcurves_0.5.0 rmda_1.6

[43] rms_8.0-0 Hmisc_5.2-3 pROC_1.19.0.1

[46] caret_7.0-1 gbm_2.2.2 DALEX_2.5.2

[49] openxlsx_4.2.8 reshape2_1.4.4 lubridate_1.9.4

[52] forcats_1.0.0 stringr_1.5.1 dplyr_1.1.4

[55] purrr_1.1.0 readr_2.1.6 tidyr_1.3.1

[58] tibble_3.3.0 ggplot2_4.0.1 tidyverse_2.0.0

[61] rlang_1.1.6 pbapply_1.7-4 shapviz_0.10.2

[64] DMwR_0.4.1 lattice_0.22-7 extraTrees_1.0.5

[67] rJava_1.0-11 catboost_1.2.5

**List S2** Packages loaded via a Namespace (Not Attached)

[1] IRanges_2.42.0 sjmisc_2.8.11 ggfittext_0.10.2

[4] nnet_7.3-20 TH.data_1.1-4 vctrs_0.6.5

[7] digest_0.6.37 png_0.1-8 shape_1.4.6.1

[10] proxy_0.4-27 pammtools_0.7.3 ggrepel_0.9.6

[13] parallelly_1.45.1 MASS_7.3-65 fontLiberation_0.1.0

[16] reshape_0.8.10 httpuv_1.6.16 BiocGenerics_0.54.0

[19] withr_3.0.2 xfun_0.53 MatrixModels_0.5-4

[22] shades_1.4.0 systemfonts_1.3.1 ragg_1.5.0

[25] zoo_1.8-14 GlobalOptions_0.1.2 gtools_3.9.5

[28] quantmod_0.4.28 ConsRank_2.1.5 DEoptimR_1.1-4

[31] maxstat_0.7-26 rlist_0.4.6.2 promises_1.3.3

[34] httr_1.4.7 globals_0.18.0 rstudioapi_0.17.1

[37] pan_1.9 generics_0.1.4 base64enc_0.1-3

[40] curl_7.0.0 S4Vectors_0.46.0 mitools_2.4

[43] BBmisc_1.13 lgr_0.5.0 xtable_1.8-4

[46] evaluate_1.0.5 hms_1.1.3 glmnet_4.1-10

[49] labelled_2.15.0 cmprsk_2.2-12 reticulate_1.43.0

[52] magrittr_2.0.4 lmtest_0.9-40 later_1.4.4

[55] palmerpenguins_0.1.1 future.apply_1.20.0 robustbase_0.99-6

[58] matrixStats_1.5.0 xts_0.14.1 class_7.3-23

[61] pillar_1.11.1 nlme_3.1-168 compiler_4.5.1

[64] stringi_1.8.7 paradox_1.0.1 gower_1.0.2

[67] jomo_2.7-6 minqa_1.2.8 plyr_1.8.9

[70] crayon_1.5.3 abind_1.4-8 haven_2.5.5

[73] sp_2.2-0 sandwich_3.1-1 codetools_0.2-20

[76] multcomp_1.4-28 textshaping_1.0.3 recipes_1.3.1

[79] openssl_2.3.4 TTR_0.24.4 pec_2025.06.24

[82] flextable_0.9.10 GetoptLong_1.0.5 plotly_4.11.0

[85] moonBook_0.3.1 mime_0.13 splines_4.5.1

[88] Rcpp_1.1.0 quantreg_6.1 compare_0.2-6

[91] exactRankTests_0.8-35 knitr_1.50 clue_0.3-66

[94] lme4_1.1-37 listenv_0.9.1 checkmate_2.3.3

[97] Rdpack_2.6.4 scam_1.2-19 tzdb_0.5.0

[100] pkgconfig_2.0.3 tools_4.5.1 rbibutils_2.3

[103] stargazer_5.2.3 viridisLite_0.4.2 DBI_1.2.3

[106] numDeriv_2016.8-1.1 fastmap_1.2.0 rmarkdown_2.30

[109] kknn_1.4.1 mets_1.3.7 broom_1.0.10

[112] officer_0.7.0 patchwork_1.3.2 insight_1.4.2

[115] carData_3.0-5 farver_2.1.2 reformulas_0.4.1

[118] mgcv_1.9-3 cli_3.6.5 gggenes_0.5.1

[121] stats4_4.5.1 lifecycle_1.0.4 askpass_1.2.1

[124] tidycmprsk_1.1.0 mvtnorm_1.3-3 lava_1.8.1

[127] kernlab_0.9-33 backports_1.5.0 timechange_0.3.0

[130] gtable_0.3.6 rjson_0.2.23 Metrics_0.1.4

[133] jsonlite_2.0.0 mitml_0.4-5 xgboost_1.7.11.1

[136] zip_2.3.3 ranger_0.17.0 polspline_1.1.25

[139] timeDate_4041.110 lazyeval_0.2.2 pander_0.6.6

[142] shiny_1.11.1 rgl_1.3.24 htmltools_0.5.8.1

[145] sjlabelled_1.2.0 glue_1.8.0 timereg_2.0.7

[148] gdtools_0.4.3 gtsummary_2.4.0 gridExtra_2.3

[151] boot_1.3-32 igraph_2.2.1 R6_2.6.1

[154] labeling_0.4.3 vcd_1.4-13 cluster_2.1.8.1

[157] ipred_0.9-15 nloptr_2.2.1 mlr3misc_0.19.0

[160] tidyselect_1.2.1 htmlTable_2.4.3 xml2_1.4.0

[163] fontBitstreamVera_0.1.1 car_3.1-3 future_1.67.0

[166] ModelMetrics_1.2.2.2 S7_0.2.0 laeken_0.5.3

[169] fontquiver_0.2.1 htmlwidgets_1.6.4 uuid_1.2-1

[172] hardhat_1.4.2 prodlim_2025.04.28

**Table S2** Baseline characteristics of the dataset

| **Variables** | **Total**  **(N = 834)** | **Training set**  **(N = 584)** | **Testing set**  **(N = 250)** | **P-Value** |
| --- | --- | --- | --- | --- |
| APs, n(%) |  |  |  | 0.912 |
| Quetiapine | 142 (17.0) | 98 (16.8) | 44 (17.6) |  |
| Clozapine | 290 (34.8) | 207 (35.4) | 83 (33.2) |  |
| Olanzapine | 244 (29.3) | 171 (29.3) | 73 (29.2) |  |
| Risperidone | 158 (18.9) | 108 (18.5) | 50 (20.0) |  |
| Sedatives, n(%) |  |  |  | 0.269 |
| No | 273 (32.7) | 196 (33.6) | 77 (30.8) |  |
| Lorazepam | 359 (43.0) | 246 (42.1) | 113 (45.2) |  |
| Alprazolam | 48 (5.8) | 34 (5.8) | 14 (5.6) |  |
| Clonazepam | 37 (4.4) | 27 (4.6) | 10 (4.0) |  |
| Oxazepam | 39 (4.7) | 33 (5.7) | 6 (2.4) |  |
| Zopiclone | 34 (4.1) | 21 (3.6) | 13 (5.2) |  |
| Estazolam | 44 (5.3) | 27 (4.6) | 17 (6.8) |  |
| Concomitant APs, n(%) |  |  |  | 0.146 |
| No | 595 (71.3) | 428 (73.3) | 167 (66.8) |  |
| Aripiprazole | 177 (29.7) | 114 (19.5) | 63 (25.2) |  |
| Blonanserin | 62 (7.4) | 42 (7.2) | 20 (8.0) |  |
| Anemia, n(%) |  |  |  | 0.431 |
| No | 724 (86.8) | 511 (87.5) | 213 (85.2) |  |
| Yes | 110 (13.2) | 73 (12.5) | 37 (14.8) |  |
| Education Level |  |  |  | 0.985 |
| ISCED 5 or below | 339 (40.6) | 238 (40.8) | 101 (40.4) |  |
| ISCED 6 or above | 495 (59.4) | 346 (59.2) | 149 (59.6) |  |
| Smoking, n(%) |  |  |  | 0.051 |
| No | 604 (72.4) | 435 (74.5) | 169 (67.6) |  |
| Yes | 230 (27.6) | 149 (25.5) | 81 (32.4) |  |

(Continued)

**Table S2** (Continued)

| **Variables** | **Total**  **(N = 834)** | **Training set**  **(N = 584)** | **Testing set**  **(N = 250)** | **P-Value** |
| --- | --- | --- | --- | --- |
| Alcohol drinking |  |  |  | 0.655 |
| No | 706 (84.7) | 497 (85.1) | 209 (83.6) |  |
| Yes | 128 (15.3) | 87 (14.9) | 41 (16.4) |  |
| Allergy history, n(%) |  |  |  | 0.439 |
| No | 777 (93.2) | 541 (92.6) | 236 (94.4) |  |
| Yes | 57 (6.8) | 43 (7.4) | 14 (5.6) |  |
| Gender status, n(%) |  |  |  | 0.112 |
| Female | 397 (47.6) | 289 (49.5) | 108 (43.2) |  |
| Male | 437 (52.4) | 295 (50.5) | 142 (56.8) |  |
| Marital status, n(%) |  |  |  | 0.594 |
| Married | 564 (67.6) | 399 (68.3) | 165 (66.0) |  |
| Divorced | 171 (20.5) | 120 (20.5) | 51 (20.4) |  |
| Single | 99 (11.9) | 65 (11.1) | 34 (13.6) |  |
| Family history, n(%) |  |  |  | 0.773 |
| Negative | 664 (79.6) | 467 (80.0) | 197 (78.8) |  |
| Positive | 170 (20.4) | 117 (20.0) | 53 (21.2) |  |
| HTN, n(%) |  |  |  | 0.195 |
| No | 614 (73.6) | 438 (75.0) | 176 (70.4) |  |
| Yes | 220 (26.4) | 146 (25.0) | 74 (29.6) |  |
| HLD, n(%) |  |  |  | 0.807 |
| No | 678 (81.3) | 472 (80.8) | 205 (82.0) |  |
| Yes | 156 (18.7) | 112 (19.2) | 45 (18.0) |  |
| DM, n(%) |  |  |  | 0.797 |
| No | 634 (76.0) | 441 (75.5) | 192 (76.8) |  |
| Yes | 200 (24.0) | 143 (24.5) | 58 (23.2) |  |
| CHD, n(%) |  |  |  | 0.644 |
| No | 598 (71.7) | 422 (72.3) | 176 (70.4) |  |
| Yes | 236 (28.3) | 162 (27.7) | 74 (29.6) |  |

(Continued)

**Table S2** (Continued)

| **Variables** | **Total**  **(N = 834)** | **Training set**  **(N = 584)** | **Testing set**  **(N = 250)** | **P-Value** |
| --- | --- | --- | --- | --- |
| Thyroid Disease, n(%) |  |  |  | 0.351 |
| No | 773 (92.7) | 545 (93.3) | 228 (91.2) |  |
| Yes | 61 (7.3) | 39 (6.7) | 22 (8.8) |  |
| CVA, n(%) |  |  |  | 0.967 |
| No | 735 (88.1) | 514 (88.0) | 221 (88.4) |  |
| Yes | 99 (11.9) | 70 (12.0) | 29 (11.6) |  |
| Constipation, n(%) |  |  |  | 0.485 |
| No | 464 (55.6) | 330 (56.5) | 134 (53.6) |  |
| Yes | 370 (44.4) | 254 (43.5) | 116 (46.4) |  |
| EPS, n(%) |  |  |  | 0.051 |
| No | 794 (95.2) | 562 (96.2) | 232 (92.8) |  |
| Yes | 40 (4.8) | 22 (3.8) | 18 (7.2) |  |
| MECT, n(%) |  |  |  | 0.704 |
| No | 799 (95.8) | 561 (96.1) | 238 (95.2) |  |
| Yes | 35 (4.2) | 23 (3.9) | 12 (4.8) |  |
| HPRL, n(%) |  |  |  | 0.874 |
| No | 718 (86.1) | 504 (86.3) | 214 (85.6) |  |
| Yes | 116 (13.9) | 80 (13.7) | 36 (14.4) |  |
| TESS, n(%) |  |  |  | 0.624 |
| No | 655 (78.5) | 462 (79.1) | 193 (77.2) |  |
| One-three | 139 (16.7) | 97 (16.6) | 42 (16.8) |  |
| Four-six | 40 (4.8) | 25 (4.3) | 15 (6.0) |  |
| Common cold, n(%) |  |  |  | 0.916 |
| No | 790 (94.7) | 554 (94.9) | 236 (94.4) |  |
| Yes | 44 (5.3) | 30 (5.1) | 14 (5.6) |  |
| BMI, (kg/m2) | 23.8 (23.5, 24.8) | 23.9 (23.5, 24.8) | 23.8 (23.5, 25.1) | 0.608 |
| History of SCZ, (years) | 22.0 (15.0, 28.0) | 22.0 (15.0, 28.0) | 21.0 (15.0, 28.0) | 0.955 |
| BPRS, (scores) | 40.0 (36.0, 45.3) | 41.0 (36.0, 45.0) | 40.0 (36.0, 46.0) | 0.790 |

(Continued)

**Table S2** (Continued)

| **Variables** | **Total**  **(N = 834)** | **Training set**  **(N = 584)** | **Testing set**  **(N = 250)** | **P-Value** |
| --- | --- | --- | --- | --- |
| Time, (days) | 48.0 (41.0, 56.0) | 48.0 (41.0, 55.0) | 48.0 (40.8, 57.0) | 0.674 |
| Age, (years) | 50.0 (44.0, 56.0) | 50.0 (43.3, 56.0) | 50.0 (44.0, 56.0) | 0.683 |
| HR, (bpm) | 84.0 (81.0, 88.0) | 84.0 (81.0, 88.0) | 84.0 (81.0, 90.0) | 0.266 |
| FBG, (mmol/L) | 5.34 (4.98, 5.96) | 5.37 (4.98, 5.95) | 5.34 (4.98, 6.03) | 0.649 |
| ALT, (U/L) | 33.0 (27.0, 39.0) | 33.0 (27.0, 39.0) | 32.0 (27.0, 38.0) | 0.354 |
| AST, (U/L) | 33.0 (27.0, 40.0) | 33.0 (27.0, 39.8) | 33.5 (27.0, 40.0) | 0.426 |
| GGT, (U/L) | 31.0 (24.0, 40.0) | 30.5 (24.0, 40.0) | 31.5 (24.0, 41.0) | 0.721 |
| TG, (mmol/L) | 1.28 (0.93, 1.68) | 1.28 (0.93, 1.68) | 1.30 (0.94, 1.68) | 0.221 |
| Tc, (mmol/L) | 4.27 (3.85, 4.85) | 3.85 (3.85, 4.85) | 4.28 (3.91, 4.85) | 0.154 |
| HDL-C, (mmol/L) | 1.31 (1.22, 1.40) | 1.33 (1.22, 1.40) | 1.31 (1.24, 1.40) | 0.682 |
| LDL-C, (mmol/L) | 3.04 (2.48, 3.35) | 3.04 (2.46, 3.35) | 3.04 (2.50, 3.35) | 0.892 |
| SCr, (μmol/L) | 88.0 (82.0, 95.0) | 88.0 (82.0, 95.0) | 86.5 (81.0, 93.3) | 0.109 |
| Urea, (mmol/L) | 5.44 (4.96, 6.10) | 5.46 (5.06, 6.10) | 5.43 (4.96, 5.96) | 0.230 |
| UA, (μmol/L) | 360 (318, 420) | 364 (322, 419) | 360 (310, 420) | 0.356 |
| RBC, (1012/L) | 4.51 (4.35, 4.81) | 4.56 (4.35, 4.82) | 4.50 (4.35, 4.80) | 0.499 |
| WBC, (109/L) | 8.50 (7.55, 9.12) | 8.50 (7.55, 8.98) | 8.46 (7.55, 9.14) | 0.757 |
| HB, (g/L) | 145 (140, 148) | 145 (140, 148) | 145 (138, 147) | 0.172 |
| Neut, (109/L) | 4.69 (4.35, 5.36) | 4.69 (4.35, 5.36) | 4.70 (4.33, 5.39) | 0.793 |

**Table S3** Patient characteristics and baseline variables

| **Variables** | **Quetiapine**  **(N = 99)** | **Clozapine**  **(N = 238)** | **Olanzapine**  **(N = 177)** | **Risperidone**  **(N = 81)** | **P-Value** |
| --- | --- | --- | --- | --- | --- |
| Result |  |  |  |  | 0.912 |
| Ineffective | 31 (31.3) | 66 (27.7) | 53 (29.9) | 23 (28.4) |  |
| Effective | 68 (68.7) | 172 (72.3) | 124 (70.1) | 58 (71.6) |  |
| Sedatives, n(%) |  |  |  |  | <0.001 |
| No | 40 (40.4) | 74 (31.1) | 74 (41.8) | 18 (22.2) |  |
| Lorazepam | 42 (42.4) | 110 (46.2) | 63 (35.6) | 44 (54.3) |  |
| Alprazolam | 2 (2.0) | 13 (5.5) | 9 (5.1) | 11 (13.6) |  |
| Clonazepam | 6 (6.1) | 5 (2.1) | 3 (1.7) | 3 (3.7) |  |
| Oxazepam | 2 (2.0) | 17 (7.1) | 12 (6.8) | 1 (1.2) |  |
| Zopiclone | 2 (2.0) | 13 (5.5) | 4 (2.3) | 1 (1.2) |  |
| Estazolam | 5 (5.1) | 6 (2.5) | 12 (6.8) | 3 (3.7) |  |
| Anemia, n(%) |  | |  |  | 0.916 |
| No | 89 (89.9) | 211 (88.7) | 159 (89.8) | 74 (91.4) |  |
| Yes | 10 (10.1) | 27 (11.3) | 18 (10.2) | 7 (8.6) |  |
| Education Level |  | |  |  | <0.001 |
| ISCED 5 or below | 23 (23.2) | 88 (37.0) | 73 (41.2) | 45 (55.6) |  |
| ISCED 6 or above | 76 (76.8) | 150 (63.0) | 104 (58.8) | 36 (44.4) |  |
| Smoking, n(%) |  | |  |  | 0.182 |
| No | 81 (81.8) | 181 (76.1) | 125 (70.6) | 58 (71.6) |  |
| Yes | 18 (18.2) | 57 (23.9) | 52 (29.4) | 23 (28.4) |  |
| Alcohol drinking |  |  |  |  | 0.831 |
| No | 83 (83.8) | 202 (84.9) | 152 (85.9) | 66 (81.5) |  |
| Yes | 16 (16.2) | 36 (15.1) | 25 (14.1) | 15 (18.5) |  |
| Allergy history, n(%) | |  |  |  | 0.037 |
| No | 93 (93.9) | 222 (93.3) | 168 (94.9) | 69 (85.2) |  |
| Yes | 6 (6.1) | 16 (6.7) | 9 (5.1) | 12 (14.8) |  |

(Continued)

**Table S3** (Continued)

| **Variables** | **Quetiapine**  **(N = 99)** | **Clozapine**  **(N = 238)** | **Olanzapine**  **(N = 177)** | **Risperidone**  **(N = 81)** | **P-Value** |
| --- | --- | --- | --- | --- | --- |
| Gender status, n(%) |  |  |  |  | 0.119 |
| Female | 48 (48.5) | 107 (45.0) | 86 (48.6) | 49 (60.5) |  |
| Male | 51 (51.5) | 131 (55.0) | 91 (51.4) | 32 (39.5) |  |
| Marital status, n(%) | |  |  |  | <0.001 |
| Married | 60 (60.6) | 166 (69.7) | 113 (63.8) | 60 (74.1) |  |
| Divorced | 14 (14.1) | 59 (24.8) | 34 (19.2) | 18 (22.2) |  |
| Single | 25 (25.3) | 13 (5.5) | 30 (16.9) | 3 (3.7) |  |
| Family history, n(%) |  |  |  |  | <0.001 |
| Negative | 75 (75.8) | 209 (87.8) | 128 (72.3) | 58 (71.6) |  |
| Positive | 24 (24.2) | 29 (12.2) | 49 (27.7) | 23 (28.4) |  |
| HTN, n(%) |  | |  |  | 0.866 |
| No | 78 (78.8) | 181 (76.1) | 137 (77.4) | 65 (80.2) |  |
| Yes | 21 (21.2) | 57 (23.9) | 40 (22.6) | 16 (19.8) |  |
| HLD, n(%) | |  |  |  | 0.905 |
| No | 83 (83.8) | 205 (86.1) | 152 (85.9) | 71 (87.7) |  |
| Yes | 16 (16.2) | 33 (13.9) | 25 (14.1) | 10 (12.3) |  |
| DM, n(%) |  |  |  |  | 0.503 |
| No | 79 (79.8) | 187 (78.6) | 134 (75.7) | 68 (84.0) |  |
| Yes | 20 (20.2) | 51 (21.4) | 43 (24.3) | 13 (16.0) |  |
| CHD, n(%) |  |  |  |  | 0.089 |
| No | 80 (80.8) | 177 (74.4) | 128 (72.3) | 52 (64.2) |  |
| Yes | 19 (19.2) | 61 (25.6) | 49 (27.7) | 29 (35.8) |  |
| Thyroid Disease, n(%) | |  |  |  | 0.389 |
| No | 94 (94.9) | 223 (93.7) | 169 (95.5) | 73 (90.1) |  |
| Yes | 5 (5.1) | 15 (6.3) | 8 (4.5) | 8 (9.9) |  |
| CVA, n(%) |  |  |  |  | 0.541 |
| No | 88 (88.9) | 220 (92.4) | 157 (88.7) | 72 (88.9) |  |
| Yes | 11 (11.1) | 18 (7.6) | 20 (11.3) | 9 (11.1) |  |

(Continued)

**Table S3** (Continued)

| Variables | Quetiapine  (N = 99) | Clozapine  (N = 238) | Olanzapine  (N = 177) | Risperidone  (N = 81) | P-Value |
| --- | --- | --- | --- | --- | --- |
| Constipation, n(%) | |  |  |  | 0.094 |
| No | 50 (50.5) | 131 (55.0) | 105 (59.3) | 55 (67.9) |  |
| Yes | 49 (49.5) | 107 (45.0) | 72 (40.7) | 26 (32.1) |  |
| EPS, n(%) |  |  |  |  | 0.315 |
| No | 98 (99.0) | 229 (96.2) | 169 (95.5) | 76 (93.8) |  |
| Yes | 1 (1.0) | 9 (3.8) | 8 (4.5) | 5 (6.2) |  |
| MECT, n(%) |  |  |  |  | 0.154 |
| No | 91 (91.9) | 228 (95.8) | 170 (96.0) | 80 (98.8) |  |
| Yes | 8 (8.1) | 10 (4.2) | 7 (4.0) | 1 (1.2) |  |
| HPRL, n(%) | |  |  |  | 0.491 |
| No | 86 (86.9) | 219 (92.0) | 162 (91.5) | 74 (91.4) |  |
| Yes | 13 (13.1) | 19 (8.0) | 15 (8.5) | 7 (8.6) |  |
| TESS, n(%) |  |  |  |  | 0.997 |
| 0 | 79 (79.8) | 185 (77.7) | 142 (80.2) | 65 (80.2) |  |
| 1-3 | 17 (17.2) | 45 (18.9) | 30 (17.0) | 14 (17.3) |  |
| 4-6 | 3 (3.0) | 8 (3.4) | 5 (2.8) | 2 (3.1) |  |
| Common cold, n(%) | |  |  |  | 0.427 |
| No | 97 (98.0) | 230 (96.6) | 168 (94.9) | 76 (93.8) |  |
| Yes | 2 (2.0) | 8 (3.4) | 9 (5.1) | 5 (6.2) |  |
| BMI, (kg/m2) | 23.9 (23.6,24.8) | 23.8 (23.5,24.8) | 23.7 (23.5,24.6) | 24.2 (23.6,24.8) | 0.051 |
| History of SCZ,(years) | 22.0 (18.0,25.5) | 23.0 (17.0,30.0) | 20.0 (11.0,27.0) | 21.0 (18.0,25.0) | 0.004 |
| BPRS, (scores) | 42.0 (36.0,46.0) | 40.0 (36.0,44.8) | 41.0 (36.0,46.0) | 42.0 (38.0,43.0) | 0.160 |
| Time, (days) | 48.0 (42.5,56.0) | 47.0 (40.0,54.7) | 46.0 (40.0,56.0) | 50.0 (43.0,55.0) | 0.158 |
| Age, (years) | 49.0 (45.0,53.0) | 51.0 (45.0,55.0) | 49.0 (37.0,59.0) | 49.0 (45.0,52.0) | 0.168 |
| HR, (bpm) | 84.0 (81.0,86.0) | 84.0 (81.0,88.0) | 84.0 (81.0,88.0) | 84.0 (81.0,90.0) | 0.532 |
| FBG, (mmol/L) | 5.34 (4.72,5.93) | 5.34 (5.11,5.93) | 5.46 (5.11,5.93) | 5.34 (5.18,5.78) | 0.897 |
| ALT, (U/L) | 32.0 (27.0,39.0) | 32.0 (27.0,38.0) | 33.0 (28.0,38.0) | 31.0 (26.0,34.0) | 0.210 |
| AST, (U/L) | 32.0 (27.0,37.5) | 32.0 (26.0,39.0) | 34.0 (27.0,40.0) | 32.0 (26.0,38.0) | 0.230 |

(Continued)

**Table S3** (Continued)

| **Variables** | **Quetiapine**  **(N = 99)** | **Clozapine**  **(N = 238)** | **Olanzapine**  **(N = 177)** | **Risperidone**  **(N = 81)** | **P-Value** |
| --- | --- | --- | --- | --- | --- |
| GGT, (U/L) | 34.0 (26.0,39.0) | 30.0 (24.0,37.0) | 30.0 (24.0,41.0) | 31.0 (24.0,46.0) | 0.095 |
| TG, (mmol/L) | 1.22 (0.88,1.50) | 1.28 (0.93,1.62) | 1.24 (0.92,1.62) | 1.35 (0.94,1.86) | 0.074 |
| Tc, (mmol/L) | 4.17 (3.78,4.75) | 4.27 (3.85,4.67) | 4.22 (3.85,4.85) | 4.22 (3.85,4.58) | 0.185 |
| HDL-C, (mmol/L) | 1.33 (1.25,1.40) | 1.35 (1.25,1.40) | 1.32 (1.24,1.40) | 1.30 (1.16,1.39) | 0.169 |
| LDL-C, (mmol/L) | 3.06 (2.55,3.24) | 2.84 (2.46,3.15) | 2.89 (2.49,3.22) | 3.03 (2.29,3.47) | 0.363 |
| SCr, (μmol/L) | 90.0 (80.0,95.0) | 87.0 (82.0,94.0) | 86.0 (82.0,95.0) | 88.0 (82.0,93.0) | 0.951 |
| Urea, (mmol/L) | 5.47 (5.14,6.10) | 5.42 (4.96,5.86) | 5.50 (5.05,6.10) | 5.44 (4.96,5.96) | 0.255 |
| UA, (μmol/L) | 367 (322,417.5) | 360 (320,411) | 359 (308,420) | 368 (312,432) | 0.457 |
| RBC, (1012/L) | 4.66 (4.42,5.10) | 4.57 (4.35,4.82) | 4.50 (4.36,4.73) | 4.47 (4.35,4.80) | 0.061 |
| WBC, (109/L) | 8.50 (7.52,9.17) | 8.56 (7.58,9.22) | 8.41 (7.55,8.96) | 8.31 (7.42,8.93) | 0.568 |
| HB, (g/L) | 145 (140,150) | 145 (140,148) | 145 (140,147) | 145. (140,147) | 0.408 |
| Neut, (109/L) | 4.80 (4.32,5.67) | 4.66 (4.37,5.25) | 4.80 (4.36,5.67) | 4.66 (4.42,5.01) | 0.064 |
